# Supplementary material for: Chemotaxonomy of Mycotoxigenic Small-Spored Alternaria Fungi – Do Multitoxin Mixtures Act as an Indicator for Species Differentiation?
Source: PubMed Central journal article supplement (PMC6037717; doi:10.3389/fmicb.2018.01368), 2018-07-03
Supplement: Image_1.pdf [file Image_1.pdf]

## Chemotaxonomy of Mycotoxigenic Small-Spored *Alternaria* Fungi – Do Multitoxin Mixtures Act as an Indicator for Species Differentiation?

Theresa Zwickel<sup>1,2\*</sup>, Sandra M. Kahl<sup>3,4</sup>, Michael Rychlik<sup>2</sup> and Marina E. H. Müller<sup>3\*</sup>

<sup>1</sup> Federal Institute for Risk Assessment (BfR), Berlin, Germany, <sup>2</sup> Chair of Analytical Food Chemistry, Technical University of Munich, Munich, Germany, <sup>3</sup> Leibniz Centre for Agricultural Landscape Research (ZALF), Müncheberg, Germany, <sup>4</sup> University of Potsdam, Institute of Biochemistry und Biology, Potsdam, Germany

\*Correspondence: Marina E. H. Müller; [mmueller@zalf.de](mailto:mmueller@zalf.de)

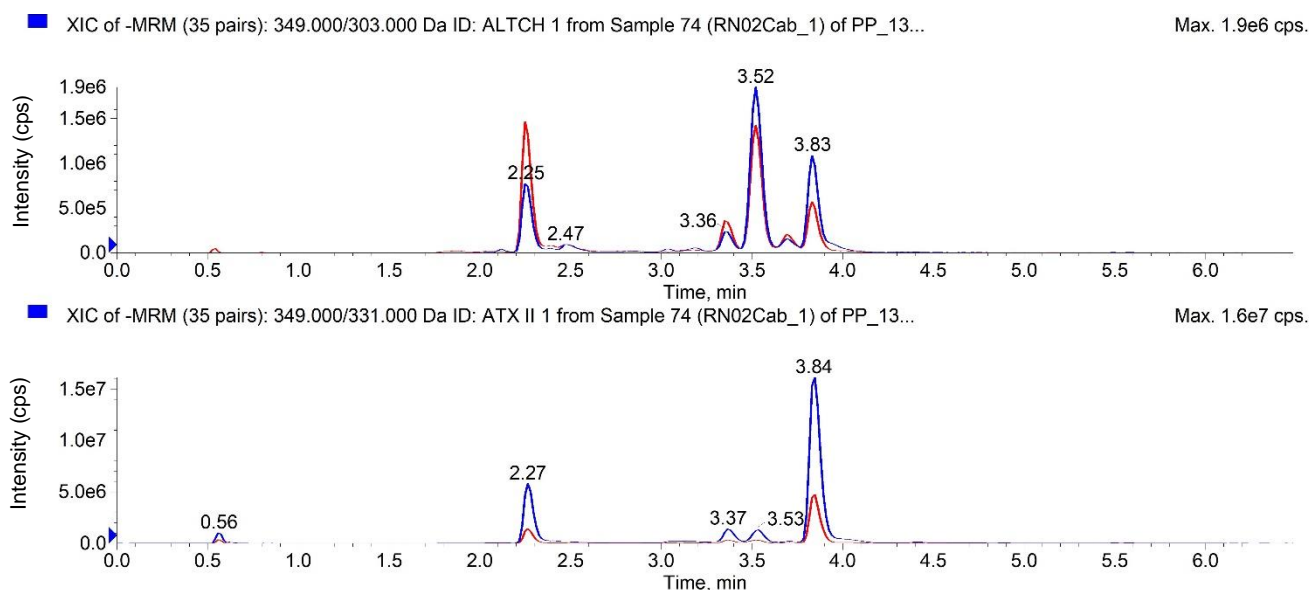

**Figure-S1:** Extracted ion chromatogram of alterperlylenol (above) and altertoxin-II (below)
