# Supplementary material for: Chemotaxonomy of Mycotoxigenic Small-Spored Alternaria Fungi – Do Multitoxin Mixtures Act as an Indicator for Species Differentiation?
Source: PubMed Central journal article supplement (PMC6037717; doi:10.3389/fmicb.2018.01368), 2018-07-03
Supplement: Table_1.pdf [file Table_1.pdf]

## Chemotaxonomy of Mycotoxigenic Small-Spored *Alternaria* Fungi – Do Multitoxin Mixtures Act as an Indicator for Species Differentiation?

**Theresa Zwickel<sup>1,2\*</sup>, Sandra M. Kahl<sup>3,4</sup>, Michael Rychlik<sup>2</sup> and Marina E. H. Müller<sup>3\*</sup>**

<sup>1</sup> Federal Institute for Risk Assessment (BfR), Berlin, Germany, <sup>2</sup> Chair of Analytical Food Chemistry, Technical University of Munich, Munich, Germany, <sup>3</sup> Leibniz Centre for Agricultural Landscape Research (ZALF), Müncheberg, Germany, <sup>4</sup> University of Potsdam, Institute of Biochemistry und Biology, Potsdam, Germany

\*Correspondence: Marina E. H. Müller; [mmueller@zalf.de](mailto:mmueller@zalf.de)

**Table-S1:** *Alternaria* strains used in this study isolated from winter wheat kernels, with geographical origin and species-group affiliation. The names consist of a code of country (first capital letter; G: Germany, R: Russia), region (capital letter; H: Helpt, N: Novosibirsk, St: Steinfurth), identification number and sporulation group (a: *A. alternata*, ab: *A. arborescens*, i: *A. infectoria* and t: *A. tenuissima*).

| Species-group               | Origin  | Standard culture | Germany region of Helpt      | Germany region of Steinfurth | Russia region of Novosibirsk |
|-----------------------------|---------|------------------|------------------------------|------------------------------|------------------------------|
| <i>Alternaria alternata</i> |         | EGS# 34-016      | GH 16a                       | GST 03a                      | RN 06Aa                      |
|                             |         |                  | GH 21a                       | GST 05a                      | RN 06Ba                      |
|                             |         |                  | GH 23a                       | GST 08a                      | RN 11Ca                      |
|                             |         |                  | GH 32a                       | GST 11a                      |                              |
|                             |         |                  | GH 49a                       | GST 15a                      |                              |
|                             |         |                  |                              | GST 17a                      |                              |
|                             |         |                  |                              | GST20a                       |                              |
|                             |         |                  |                              | GST 24a                      |                              |
|                             |         |                  |                              | GST 30a                      |                              |
|                             |         |                  |                              | GST 37a                      |                              |
|                             |         |                  |                              | GST 38a                      |                              |
|                             |         |                  |                              | GST 40a                      |                              |
|                             |         |                  | <i>Alternaria tenuissima</i> |                              | EGS# 34-015                  |
| GH 26t                      | GST 09t | RN 02At          |                              |                              |                              |
| GH 29t                      | GST 14t | RN 02Bt          |                              |                              |                              |
| GH 31t                      | GST 16t | RN 02Dt          |                              |                              |                              |
| GH 36t                      | GST 19t | RN 03At          |                              |                              |                              |
| GH 46t                      | GST 23t | RN 04Bt          |                              |                              |                              |
| GH 50t                      | GST 31t | RN 06Ct          |                              |                              |                              |
|                             | GST 44t | RN 06Dt          |                              |                              |                              |
|                             | GST 47t | RN 07At          |                              |                              |                              |
|                             | GST 52t | RN 07Bt          |                              |                              |                              |
|                             |         | RN 08Bt          |                              |                              |                              |
|                             |         | RN 08Dt          |                              |                              |                              |
|                             |         | RN 09At          |                              |                              |                              |
|                             |         | RN 09Bt          |                              |                              |                              |
|                             |         | RN 09Ct          |                              |                              |                              |
|                             |         | RN 10At          |                              |                              |                              |
|                             |         | RN 10Bt          |                              |                              |                              |

**Chemotaxonomy of Mycotoxigenic Small-Spored *Alternaria* Fungi – Do Multitoxin Mixtures Act as an Indicator for Species Differentiation?**

| Species-group                 | Origin | Standard culture         | Germany region of Helpt | Germany region of Steinfurth | Russia region of Novosibirsk |
|-------------------------------|--------|--------------------------|-------------------------|------------------------------|------------------------------|
| <i>Alternaria arborescens</i> |        | CSB <sup>##</sup> 102605 | GH 35ab                 | GST 07ab                     | RN 02Cab                     |
|                               |        |                          |                         | GST 22ab                     | RN 05Bab                     |
|                               |        |                          |                         | GST 28ab                     |                              |
|                               |        |                          |                         | GST 32ab                     |                              |
|                               |        |                          |                         | GST 33ab                     |                              |
|                               |        |                          |                         | GST 41ab                     |                              |
|                               |        |                          |                         | GST 53ab                     |                              |
| <i>Alternaria infectoria</i>  |        | CSB <sup>##</sup> 210.86 | GH 04i                  | GST 01i                      | RN 04Ai                      |
|                               |        |                          | GH 09i                  | GST 25i                      | RN 07Ci                      |
|                               |        |                          | GH 10i                  | GST 34i                      |                              |
|                               |        |                          | GH 12i                  | GST 46i                      |                              |
|                               |        |                          | GH 13i                  | GST 51i                      |                              |
|                               |        |                          | GH 19i                  |                              |                              |
|                               |        |                          | GH 28i                  |                              |                              |
|                               |        |                          | GH 33i                  |                              |                              |
|                               |        |                          | GH 34i                  |                              |                              |
|                               |        |                          | GH 38i                  |                              |                              |
|                               |        |                          | GH 40i                  |                              |                              |
|                               |        |                          | GH 41i                  |                              |                              |
|                               |        |                          | GH 45i                  |                              |                              |
|                               |        |                          | GH 47i                  |                              |                              |
|                               |        |                          | GH 48i                  |                              |                              |
|                               |        |                          | GH 53i                  |                              |                              |
| GH 55i                        |        |                          |                         |                              |                              |
| GH 56i                        |        |                          |                         |                              |                              |

<sup>#</sup>EGS: Personal collection of Dr. E.G. Simmons

<sup>##</sup> CSB:Centraalbureau voor Schimmelcultures, Fungal Biodiversity Centre (Utrecht)
