# Supplementary material for: Chemotaxonomy of Mycotoxigenic Small-Spored Alternaria Fungi – Do Multitoxin Mixtures Act as an Indicator for Species Differentiation?
Source: PubMed Central journal article supplement (PMC6037717; doi:10.3389/fmicb.2018.01368), 2018-07-03
Supplement: Table_2.pdf [file Table_2.pdf]

## Chemotaxonomy of Mycotoxigenic Small-Spored *Alternaria* Fungi – Do Multitoxin Mixtures Act as an Indicator for Species Differentiation?

Theresa Zwickel<sup>1,2\*</sup>, Sandra M. Kahl<sup>3,4</sup>, Michael Rychlik<sup>2</sup> and Marina E. H. Müller<sup>3\*</sup>

<sup>1</sup> Federal Institute for Risk Assessment (BfR), Berlin, Germany, <sup>2</sup> Chair of Analytical Food Chemistry, Technical University of Munich, Munich, Germany, <sup>3</sup> Leibniz Centre for Agricultural Landscape Research (ZALF), Müncheberg, Germany, <sup>4</sup> University of Potsdam, Institute of Biochemistry und Biology, Potsdam, Germany

\*Correspondence: Marina E. H. Müller; [mmueller@zalf.de](mailto:mmueller@zalf.de)

**Table-S2:** Selected ion transitions with optimized collision energies (CE), collision cell exit potential (CXP), declustering potential (DP), ion ratio<sup>#</sup>, retention time (Rt) for each analyte and general mass spectrometer<sup>##</sup> and ion source<sup>###</sup> settings

| Analyte name  | Q1 mass (Da)<br>Quantifier | Q3 mass (Da)<br>Qualifier | DP<br>(volt) | CE<br>(volt) | CXP<br>(volt) | ion<br>ratio | R <sub>t</sub><br>(min) |
|---------------|----------------------------|---------------------------|--------------|--------------|---------------|--------------|-------------------------|
| AAL TB1+TB2 1 | 504.3                      | 156.8                     | -80          | -34          | -11           | 0.13         | 3.98                    |
| AAL TB1+TB2 2 | 504.3                      | 112.9                     | -80          | -52          | -9            |              | 3.98                    |
| ALT 1         | 291.0                      | 229.1                     | -50          | -20          | -13           | 0.56         | 4.21                    |
| ALT 2         | 291.0                      | 246.9                     | -50          | -28          | -11           |              | 4.21                    |
| AA-III 1      | 320.9                      | 233.1                     | -70          | -22          | -13           | 0.16         | 3.72                    |
| AA-III 2      | 320.9                      | 277.0                     | -70          | -18          | -15           |              | 3.72                    |
| ATL 1         | 272.9                      | 258.1                     | -90          | -32          | -15           | 0.28         | 3.84                    |
| ATL 2         | 272.9                      | 174.1                     | -90          | -44          | -15           |              | 3.84                    |
| AOH 1         | 257.0                      | 214.9                     | -80          | -36          | -15           | 0.48         | 3.98                    |
| AOH 2         | 257.0                      | 147.1                     | -80          | -46          | -9            |              | 3.98                    |
| AME 1         | 270.9                      | 256.1                     | -75          | -30          | -11           | 0.18         | 4.62                    |
| AME 2         | 270.9                      | 228.0                     | -75          | -40          | -17           |              | 4.62                    |
| ATX-I 1       | 351.0                      | 333.1                     | -70          | -14          | -11           | 0.94         | 4.33                    |
| ATX-I 2       | 351.0                      | 315.0                     | -70          | -22          | -9            |              | 4.33                    |
| ATX-II 1      | 349.0                      | 330.9                     | -85          | -18          | -17           | 0.21         | 4.48                    |
| ATX-II 2      | 349.0                      | 313.0                     | -85          | -30          | -17           |              | 4.48                    |
| isoALT 1      | 291.0                      | 246.9                     | -65          | -18          | -13           | 0.29         | 4.21                    |
| isoALT 2      | 291.0                      | 229.1                     | -65          | -40          | -13           |              | 4.21                    |
| STTX-III 1    | 347.0                      | 300.9                     | -85          | -30          | -17           | 0.80         | 4.51                    |
| STTX-III 2    | 347.0                      | 328.9                     | -85          | -22          | -15           |              | 4.51                    |
| ALP 1         | 349.0                      | 303                       | -85          | -20          | -17           | 0.40         | 4.30                    |
| ALP 2         | 349.0                      | 261                       | -85          | -32          | -15           |              | 4.30                    |
| TEN 1         | 413.0                      | 141.0                     | -85          | -28          | -7            | 0.80         | 4.37                    |
| TEN 2         | 413.0                      | 270.9                     | -85          | -22          | -11           |              | 4.37                    |
| TeA 1         | 196.0                      | 138.9                     | -50          | -26          | -9            | 0.84         | 3.87                    |
| TeA 2         | 196.0                      | 111.9                     | -50          | -32          | -7            |              | 3.78                    |

Chemotaxonomy of Mycotoxigenic Small-Spored *Alternaria* Fungi –  
 Do Multitoxin Mixtures Act as an Indicator for Species Differentiation?

| Analyte name   | Q1 mass (Da)<br>Quantifier | Q3 mass (Da)<br>Qualifier | DP<br>(volt) | CE<br>(volt) | CXP<br>(volt) | ion<br>ratio | R <sub>t</sub><br>(min) |
|----------------|----------------------------|---------------------------|--------------|--------------|---------------|--------------|-------------------------|
| AME-Sulf 1     | 351.1                      | 271                       | -50          | -28          | -11           | 0.37         | 3.18                    |
| AME-Sulf 2     | 351.1                      | 256                       | -50          | -40          | -17           |              | 3.18                    |
| AOH-9-O-Sulf 1 | 337.1                      | 257                       | -50          | -30          | -15           | 0.26         | 2.14                    |
| AOH-3-O-Sulf 1 |                            |                           |              |              |               |              | 2.54                    |
| AOH-9-O-Sulf 2 | 337.1                      | 213                       | -50          | -46          | -9            |              | 2.14                    |
| AOH-3-O-Sulf 2 |                            |                           |              |              |               |              | 2.54                    |
| ATL-Sulf 1     | 353.1                      | 273                       | -50          | -30          | -15           | 0.34         | 2.44                    |
| ATL-Sulf 2     | 353.1                      | 230                       | -50          | -44          | -15           |              | 2.44                    |
| ALT-Sulf 1     | 371.1                      | 291                       | -45          | -14          | -19           | 0.30         | 2.78                    |
| ALT-Sulf 2     | 371.1                      | 229                       | -45          | -44          | -19           |              | 2.78                    |
| INF 1          | 263.1                      | 143                       | -70          | -18          | -17           | 0.20         | 2.31                    |
| INF 2          | 263.1                      | 189                       | -70          | -30          | -17           |              | 2.31                    |

# response of the peak with the lower area divided by the response of the peak with the higher area

## MS parameters: Entrance potential: -10 V, collisionally activated dissociation gas: 6 (arbitrary unit)

### ESI parameters: curtain gas: 40 psi; spray gas: 35 psi; dry gas: 50 psi; ion spray voltage, -3500 V (0 – 7 min); +3500 (during equilibration time); temperature 550 °C. Ultra-high purity nitrogen (99.999%) was used as gas.
