# Supplementary material for: Chemotaxonomy of Mycotoxigenic Small-Spored Alternaria Fungi – Do Multitoxin Mixtures Act as an Indicator for Species Differentiation?
Source: PubMed Central journal article supplement (PMC6037717; doi:10.3389/fmicb.2018.01368), 2018-07-03
Supplement: Table_3.pdf [file Table_3.pdf]

## Chemotaxonomy of Mycotoxigenic Small-Spored *Alternaria* Fungi – Do Multitoxin Mixtures Act as an Indicator for Species Differentiation?

Theresa Zwickel<sup>1,2\*</sup>, Sandra M. Kahl<sup>3,4</sup>, Michael Rychlik<sup>2</sup> and Marina E. H. Müller<sup>3\*</sup>

<sup>1</sup> Federal Institute for Risk Assessment (BfR), Berlin, Germany, <sup>2</sup> Chair of Analytical Food Chemistry, Technical University of Munich, Munich, Germany, <sup>3</sup> Leibniz Centre for Agricultural Landscape Research (ZALF), Müncheberg, Germany, <sup>4</sup> University of Potsdam, Institute of Biochemistry und Biology, Potsdam, Germany

\*Correspondence: Marina E. H. Müller; [mmueller@zalf.de](mailto:mmueller@zalf.de)

**Table-S3:** Limits of detection (LODs) and limits of quantification (LOQs) determined according to DIN EN ISO 32645 (10 calibration points, Mandel fitting test at a significance level of 0.01 showed linear regression for all analytes,  $R^2 > 0.96$  for all analytes, confidence interval and t-test at a significance level of 0.05, maximal permissible uncertainty was set to 33.33%)

| Analyte  | range [ $\mu\text{g/L}$ ] | LOD [ $\mu\text{g/kg}$ ] | LOQ [ $\mu\text{g/kg}$ ] |
|----------|---------------------------|--------------------------|--------------------------|
| ALT      | 0.25 – 4.5                | 3.0                      | 9.5                      |
| AME      | 0.25 – 4.5                | 0.5                      | 1.8                      |
| AOH      | 0.50 – 4.5                | 0.6                      | 2.1                      |
| TEA      | 0.25 – 4.5                | 1.4                      | 4.6                      |
| TEN      | 0.25 – 4.5                | 0.9                      | 3.1                      |
| AAL TB   | 0.25 – 4.5                | 1.7                      | 5.5                      |
| ATX-I    | 0.50 – 4.5                | 1.1                      | 3.7                      |
| ATX-II   | 0.50 – 4.5                | 1.0                      | 3.4                      |
| STTX-III | 0.25 – 4.5                | 0.9                      | 3.2                      |
| ALP      | 0.25 – 4.5                | 1.2                      | 4.0                      |
| AA-III   | 0.25 – 4.5                | 0.9                      | 3.1                      |
| ATL      | 0.50 – 4.5                | 1.2                      | 3.7                      |
