# Supplementary material for: Chemotaxonomy of Mycotoxigenic Small-Spored Alternaria Fungi – Do Multitoxin Mixtures Act as an Indicator for Species Differentiation?
Source: PubMed Central journal article supplement (PMC6037717; doi:10.3389/fmicb.2018.01368), 2018-07-03
Supplement: Table_4.pdf [file Table_4.pdf]

## Supplementary Material

# Chemotaxonomy of Mycotoxigenic Small-Spored *Alternaria* Fungi – Do Multitoxin Mixtures Act as an Indicator for Species Differentiation?

Theresa Zwickel<sup>1,2\*</sup>, Sandra M. Kahl<sup>3,4</sup>, Michael Rychlik<sup>2</sup> and Marina E. H. Müller<sup>3\*</sup>

<sup>1</sup> Federal Institute for Risk Assessment (BfR), Berlin, Germany, <sup>2</sup> Chair of Analytical Food Chemistry, Technical University of Munich, Munich, Germany, <sup>3</sup> Leibniz Centre for Agricultural Landscape Research (ZALF), Müncheberg, Germany, <sup>4</sup> University of Potsdam, Institute of Biochemistry und Biology, Potsdam, Germany

\*Correspondence: Marina E. H. Müller; [mmueller@zalf.de](mailto:mmueller@zalf.de)

**Table-S4:** Mean content (n=5) of produced *Alternaria* toxins tenuazonic acid (TeA), alternariol (AOH), alternariol monomethyl ether (AME), altenuisol (ATL), sum of altenuene and isoaltenuene (sum(iso)ALT, altertoxin I (ATX-I), altertoxin II (ATX-II), stemphytoxin-III (STTX-III), alterperyleneol (ALP), tentoxin (TEN) and altenuic acid III (AA-III) by the *Alternaria alternata*, *A. arborescens*, *A. tenuissima* and *A. infectoria* isolates at 25 °C after 14 days in rice in g/kg (marked with \*) or mg/kg ( $\pm$  standard deviation SD; n.d. not detected = <LOD) and detected sulfated forms (marked with (s))

The names of the strains consist of a code of country (first capital letter; G: Germany, R: Russia), region (capital letter; H: Helpt, N: Novosibirsk, St: Steinfurth), identification number and sporulation group (a: *A. alternata*, ab: *A. arborescens*, i: *A. infectoria* and t: *A. tenuissima*) (Table-S1).

n.d.: not detected (value <LOD (Table-S3))

# only one value above LOQ detected

\* mean content in g/kg (all not marked values in mg/kg)

(s): sulfated form of respective *Alternaria* toxin detected

Chemotaxonomy of Mycotoxigenic Small-Spored *Alternaria* Fungi – Do Multitoxin Mixtures Act as an Indicator for Species Differentiation?

| Table-S4                                                                                 | TeA         | AOH             | AME             | ATL             | sum(iso)ALT | ATX-I       | ATX-II     | STTX-III   | ALP        | TEN         | AA-III            | INF  |
|------------------------------------------------------------------------------------------|-------------|-----------------|-----------------|-----------------|-------------|-------------|------------|------------|------------|-------------|-------------------|------|
| mean content in g/kg (marked with *) ± SD in g/kg or mean content in mg/kg ± SD in mg/kg |             |                 |                 |                 |             |             |            |            |            |             |                   |      |
| <i>Alternaria alternata</i> isolates                                                     |             |                 |                 |                 |             |             |            |            |            |             |                   |      |
| EGS 34-016                                                                               | 6.10 ±2.45  | 163 ±65         | 35.1 ±14.6 (s)  | 63.3 ±2.4       | 124 ±25     | 2.70 ±0.35  | n.d.       | 225.2 ±0.4 | 14.0 ±0.1  | n.d.        | 11.1 ±3.6         | n.d. |
| GH 16a                                                                                   | n.d.        | n.d.            | n.d.            | n.d.            | n.d.        | n.d.        | n.d.       | n.d.       | 5.9 ±0.6   | n.d.        | n.d.              | n.d. |
| GH 21a                                                                                   | 591 ±98     | 345 ±137 (s)    | 92.3 ±22.3 (s)  | 12.2 ±1.3       | 131 ±18     | 6.62 ±0.35  | 6.53 ±0.15 | 19.4 ±5.0  | n.d.       | 2.64 ±0.99  | 34.0 ±3.3         | n.d. |
| GH 23a                                                                                   | n.d.        | n.d.            | n.d.            | n.d.            | n.d.        | n.d.        | n.d.       | n.d.       | 9.4 ±0.1   | n.d.        | n.d.              | n.d. |
| GH 32a                                                                                   | 4.00 ±0.31* | 532 ±145        | 2.16 ±0.55* (s) | 33.8 ±16.6      | 131 ±33     | 164 ±23     | 47.6 ±13.2 | 39.4 ±8.8  | n.d.       | 51.2 ±9.0   | n.d.              | n.d. |
| GH 49a                                                                                   | n.d.        | n.d.            | n.d.            | n.d.            | n.d.        | 125 ±28     | n.d.       | n.d.       | 179 ±39    | n.d.        | n.d.              | d.   |
| GST 03a                                                                                  | 360 ±111    | n.d.            | n.d.            | n.d.            | n.d.        | 87.6 ±27    | 13.7 ±4.7  | 20.9 ±7.4  | 5.9 ±1.2   | n.d.        | n.d.              | n.d. |
| GST 05a                                                                                  | 9.29 ±2.94* | 5.67 ±2.18* (s) | 5.18 ±1.49* (s) | 1.22 ±0.33* (s) | 16.4 ±7.5   | 2.04 ±0.59* | 936 ±425   | 856 ±329   | 37.3 ±5.8  | 117 ±34     | 3.45 ±0.47        | n.d. |
| GST 08a                                                                                  | n.d.        | 924 ±340 (s)    | 1.12 ±0.49* (s) | 327 ±64         | 120 ±35     | 267 ±70     | 83.1 ±35.4 | 107 ±42    | 10.1 ±2.7  | 46.9 ±12.8  | 98.3 ±24.3        | n.d. |
| GST 11a                                                                                  | 396 ±44     | 90.4 ±0.4       | 5.55 ±1.13      | 6.19 ±0.72      | n.d.        | 50.2 ±12.5  | n.d.       | n.d.       | 45.3 ±0.8  | n.d.        | n.d.              | n.d. |
| GST 15a                                                                                  | 9.11 ±2.02* | 28.9 ±11.6* (s) | 7.98 ±2.33* (s) | 1.86 ±0.69* (s) | 241 ±52 (s) | 78.1 ±33.0  | 7.02 ±1.83 | 9.75 ±3.00 | 6.99 ±2.21 | n.d.        | 289 ±49           | n.d. |
| GST 17a                                                                                  | 5.89 ±1.12* | 3.85 ±1.50* (s) | 770 ±363        | 177 ±80         | 41.3 ±9.97  | 412 ±155    | 59.5 ±17.6 | 80.1 ±14.1 | 7.55 ±3.14 | 105 ±39     | 19.6 ±0.4         | n.d. |
| GST20a                                                                                   | 1.66 ±0.62* | 240 ±51         | 1.56 ±0.28*     | 138 ±42         | 40.2 ±9.9   | 1.18 ±0.50* | 765 ±194   | 798 ±101   | 12.5 ±2.3  | 56.5 ±17.8  | 8.16 ±1.62        | n.d. |
| GST 24a                                                                                  | 4.12 ±1.04* | 184 ±49         | 1.01 ±0.32*     | 143 ±41         | 68.7 ±13.2  | 440 ±179    | 225 ±47    | 336 ±40    | 23.9 ±4.5  | n.d.        | n.d.              | n.d. |
| GST 30a                                                                                  | 3.12 ±0.98* | 1.18 ±0.48*     | 2.26 ±0.76*     | 440 ±131        | 156 ±60     | 588 ±288    | 124 ±38    | 143 ±47    | 21.8 ±6.2  | 1.50 ±0.45  | 11.1 ±4.1         | n.d. |
| GST 37a                                                                                  | 3.32 ±1.08* | 161 ±32         | 1.04 ±0.16*     | 114 ±27         | 25.9 ±0.9   | 916 ±224    | 323 ±91    | 263 ±66    | 9.90 ±1.58 | 1.03 ±0.30* | n.d.              | n.d. |
| GST 38a                                                                                  | 9.32 ±1.71* | 636 ±114        | 4.13 ±0.98* (s) | 596 ±129        | 95.8 ±20.0  | 693 ±132    | 283 ±89    | 327 ±139   | n.d.       | 20.6 ±8.1   | 3.63 <sup>#</sup> | n.d. |
| GST 40a                                                                                  | n.d.        | 6.29 ±1.95* (s) | 2.48 ±1.01* (s) | 856 ±334        | 553 ±111    | 61.3 ±9.7   | 6.09 ±0.54 | 10.2 ±5.05 | 12.8 ±3.2  | n.d.        | 338 ±136          | n.d. |
| RN 06Aa                                                                                  | 4.35 ±1.06* | 6.66 ±1.95      | 6.17 ±0.72      | n.d.            | n.d.        | 100 ±16     | 170 ±62    | 350 ±130   | n.d.       | 0.37 ±0.10  | n.d.              | n.d. |
| RN 06Ba                                                                                  | 6.33 ±1.38* | 13.9 ±1.7* (s)  | 4.70 ±1.14* (s) | 660 ±109 (s)    | 75.1 ±17.4  | 717 ±209    | 516 ±208   | 362 ±155   | 8.62 ±2.53 | 123 ±34     | 5.23 ±1.66        | n.d. |
| RN 11Ca                                                                                  | 1.05 ±0.36* | 687 ±168 (s)    | 2.16 ±0.64* (s) | 297 ±75         | 92.4 ±11.9  | 529 ±154    | 234 ±73    | 313 ±81    | n.d.       | 8.08 ±0.30  | 5.75 <sup>#</sup> | n.d. |

Chemotaxonomy of Mycotoxigenic Small-Spored *Alternaria* Fungi – Do Multitoxin Mixtures Act as an Indicator for Species Differentiation?

| Table-S4                                                                                        | TeA         | AOH             | AME             | ATL             | sum(iso)ALT | ATX-I       | ATX-II     | STTX-III   | ALP        | TEN        | AA-III     | INF  |
|-------------------------------------------------------------------------------------------------|-------------|-----------------|-----------------|-----------------|-------------|-------------|------------|------------|------------|------------|------------|------|
| <b>mean content in g/kg (marked with *) ± SD in g/kg or mean content in mg/kg ± SD in mg/kg</b> |             |                 |                 |                 |             |             |            |            |            |            |            |      |
| <i>Alternaria arborescens</i> isolates                                                          |             |                 |                 |                 |             |             |            |            |            |            |            |      |
| CSB 102605                                                                                      | 1.52 ±0.48* | 2.45 ±0.83* (s) | 985 ±353 (s)    | 1.48 ±0.51* (s) | 27.9 ±6.9   | n.d.        | 14.2 ±0.1  | 365 ±109   | n.d.       | n.d.       | 2.61 ±0.62 | n.d. |
| GH 35ab                                                                                         | 2.67 ±0.38* | 985 ±353 (s)    | 976 ±445 (s)    | 22.7 ±7.8 (s)   | 253 ±70 (s) | n.d.        | n.d.       | n.d.       | n.d.       | n.d.       | 42.7 ±11.4 | n.d. |
| GST 07ab                                                                                        | n.d.        | n.d.            | n.d.            | n.d.            | n.d.        | n.d.        | n.d.       | n.d.       | n.d.       | n.d.       | n.d.       | n.d. |
| GST 22ab                                                                                        | 2.51 ±1.20* | 585 ±286 (s)    | 745 ±45 (s)     | 166 ±21         | n.d.        | 1.61 ±0.44* | 236 ±95    | 267 ±110   | 11.7 ±2.2  | 349 ±157   | n.d.       | n.d. |
| GST 28ab                                                                                        | 938 ±13     | 979 ±1          | 1.02 ±0.05*     | 136 ±27         | n.d.        | n.d.        | n.d.       | 12.1 ±2.2  | n.d.       | n.d.       | n.d.       | n.d. |
| GST 32ab                                                                                        | n.d.        | 22.3 ±6.7       | n.d.            | n.d.            | n.d.        | 38.1 ±17.2  | 45.1 ±6.3  | n.d.       | 41.5 ±9.2  | n.d.       | n.d.       | d.   |
| GST 33ab                                                                                        | 16.7 ±4.4*  | 8.21 ±1.04* (s) | 2.36 ±0.57* (s) | 321 ±76         | 14.1 ±3.7   | 525 ±252    | 367 ±143   | 447 ±137   | 29.2 ±5.3  | 9.68 ±1.42 | 1.21 ±0.19 | n.d. |
| GST 41ab                                                                                        | 1.64 ±0.41* | 5.96 ±1.80* (s) | 1.14 ±0.52* (s) | 274 ±107        | 95.1 ±20.7  | 353 ±148    | 234 ±90    | 269 ±117   | n.d.       | n.d.       | n.d.       | n.d. |
| GST 53ab                                                                                        | 8.45 ±2.21* | 2.30 ±0.70*     | 3.88 ±0.94* (s) | 867 ±219        | 165 ±52     | 288 ±74     | 74.2 ±12.1 | 96.9 ±18.5 | 1.2 ±0.4   | 112 ±4     | 19.5 ±6.8  | n.d. |
| RN 02Cab                                                                                        | 6.31 ±1.45* | 14.5 ±2.04* (s) | 4.91 ±0.18* (s) | 1.17 ±0.14* (s) | 364 ±107    | 583 ±96     | 213 ±39    | 140 ±46    | 14.4 ±1.8  | 147 ±50    | 98.1 ±17.7 | n.d. |
| RN 05Bab                                                                                        | n.d.        | 1.30*#          | 4.45 ±0.63*     | 693 ±73         | 18.5 ±0.7   | 204 ±78     | 685 ±20    | 424 ±69    | n.d.       | 26.4 ±1.2  | n.d.       | n.d. |
| <i>Alternaria tenuissima</i> isolates                                                           |             |                 |                 |                 |             |             |            |            |            |            |            |      |
| EGS 34-015                                                                                      | 1.70 ±0.71* | 65.2 ±1.4 (s)   | 1.14 ±0.02* (s) | n.d.            | 109 ±1      | 113 ±4      | 28.8 ±7.5  | 340 ±113   | n.d.       | 9.92 ±3.00 | 6.43 ±0.43 | n.d. |
| GH 18t                                                                                          | 5.56 ±0.60* | 1.05 ±0.18*     | 594 ±26         | 24.4 ±6.0       | n.d.        | 57.6 ±6.8   | 38.2 ±11.1 | 62.8 ±11.9 | n.d.       | n.d.       | n.d.       | n.d. |
| GH 26t                                                                                          | 669 ±175    | 153 ±12 (s)     | 24.0 ±2.5       | 27.2 ±6.0       | 18.8 ±5.9   | n.d.        | n.d.       | n.d.       | n.d.       | 105 ±25    | n.d.       | n.d. |
| GH 29t                                                                                          | 1.11 ±0.24* | 23.8 ±10.9      | 115 ±23 (s)     | n.d.            | 5.66 ±0.83  | 20.4 ±8.2   | 10.6 ±0.6  | 74.3 ±8.7  | n.d.       | 29.6 ±7.9  | n.d.       | n.d. |
| GH 31t                                                                                          | 6.20 ±1.23* | 469 ±167        | 2.48 ±0.84* (s) | n.d.            | n.d.        | 124 ±17     | 244 ±28    | 783 ±147   | n.d.       | 232 ±60    | n.d.       | n.d. |
| GH 36t                                                                                          | 936 ±296    | 325 ±95 (s)     | 152 ±67 (s)     | 21.4 ±5.7       | 51.2 ±24.8  | 150 ±10     | 70.6 ±5.9  | 66.2 ±2.3  | n.d.       | 50.8 ±19.5 | 23.7 ±9.6  | n.d. |
| GH 46t                                                                                          | 6.11 ±2.78* | 1.24 ±0.12*     | 4.39 ±1.67* (s) | 543 ±131        | 9.38 ±3.70  | 701 ±149    | 176 ±27    | 186 ±20    | n.d.       | 187 ±37    | n.d.       | n.d. |
| GH 50t                                                                                          | 3.72 ±0.78* | 1.78 ±0.15*     | 1.18 ±0.12* (s) | 128 ±27         | n.d.        | 860 ±78     | 141 ±39    | 244 ±54    | 24.8 ±4.6  | 31.0 ±12.0 | n.d.       | n.d. |
| GST 02t                                                                                         | 7.73 ±0.94* | 600 ±28 (s)     | 1.12 ±0.03*     | 151 ±6          | 24.7 ±5.8   | 879 ±9      | 185 ±7     | 197 ±11    | 5.05 ±0.63 | 11.1 ±1.2  | 71.8 ±3.0  | n.d. |
| GST 09t                                                                                         | 6.65 ±0.46* | 804 ±19 (s)     | 1.53 ±0.18* (s) | 247 ±57         | 96.9 ±0.4   | 415 ±99     | 67.3 ±15.1 | 72.2 ±22.1 | 7.92 ±2.44 | 200 ±52    | 14.3 ±2.9  | n.d. |
| GST 14t                                                                                         | n.d.        | n.d.            | n.d.            | n.d.            | n.d.        | 42.0 ±1.1   | 46.4 ±7.6  | n.d.       | 30.3 ±4.7  | n.d.       | n.d.       | d.   |

Chemotaxonomy of Mycotoxigenic Small-Spored *Alternaria* Fungi – Do Multitoxin Mixtures Act as an Indicator for Species Differentiation?

| Table-S4                                                                                 | TeA         | AOH             | AME             | ATL             | sum(iso)ALT  | ATX-I        | ATX-II         | STTX-III       | ALP        | TEN           | AA-III         | INF  |
|------------------------------------------------------------------------------------------|-------------|-----------------|-----------------|-----------------|--------------|--------------|----------------|----------------|------------|---------------|----------------|------|
| mean content in g/kg (marked with *) ± SD in g/kg or mean content in mg/kg ± SD in mg/kg |             |                 |                 |                 |              |              |                |                |            |               |                |      |
| <i>Alternaria tenuissima</i> isolates                                                    |             |                 |                 |                 |              |              |                |                |            |               |                |      |
| GST 16t                                                                                  | 4.33 ±0.98* | 11.7 ±3.7* (s)  | 5.06 ±0.97* (s) | 1.19 ±0.09* (s) | 308 ±68      | 195 ±67      | 36.4 ±2.6      | 38.0 ±11.1     | 3.72 ±0.90 | 25.8 ±4.3     | 95.4 ±26.8     | n.d. |
| GST 19t                                                                                  | 1.12 ±0.30* | 6.71 ±0.04* (s) | 1.73 ±0.08* (s) | 295#            | 198 ±75      | 123 ±19      | 30.3 ±4.4      | 62.8 ±9.9      | 3.83 ±2.73 | 107 ±22       | 47.0 ±10.8     | n.d. |
| GST 23t                                                                                  | 3.98 ±1.27* | 5.76 ±0.09*     | 205 ±4          | n.d.            | n.d.         | 568 ±117     | 142 ±32        | 206 ±63        | n.d.       | 50.6 ±1.1     | n.d.           | n.d. |
| GST 31t                                                                                  | 7.20 ±1.56* | 3.09 ±1.12*     | 3.48 ±0.71* (s) | 511 ±84         | 164 ±23      | 793 ±173     | 252 ±56        | 202 ±70        | n.d.       | 67.2 ±13.9    | 3.25 ±0.63     | n.d. |
| GST 44t                                                                                  | 2.46*#      | 975#            | 329#            | 56.0#           | n.d.         | 500#         | n.d.           | 182#           | 72.5#      | 27.0#         | n.d.           | n.d. |
| GST 47t                                                                                  | 6.57 ±1.28* | 6.41 ±0.29*     | 3.81 ±0.85* (s) | 583 ±121        | 329 ±91      | 348 ±111     | 117 ±14        | 150 ±13        | 9.92 ±0.34 | 116 ±28       | 167 ±17        | n.d. |
| GST 52t                                                                                  | 3.43 ±0.52* | 2.61 ±0.37*     | 3.41 ±0.59*     | 479 ±96         | 103 ±18      | 845 ±171     | 254 ±35        | 319 ±79        | 16.6 ±3.0  | 2.90 ±0.71    | 27.8 ±5.2      | n.d. |
| RN 01At                                                                                  | 3.08 ±0.69* | 3.27 ±0.43* (s) | 4.37 ±0.80* (s) | 74.4 ±12.5      | 118 ±23      | 87.9 ±12.7   | 33.9 ±10.4     | 62.3 ±16.4     | n.d.       | 1.31 ±0.36    | 8.29 ±1.25     | n.d. |
| RN 02At                                                                                  | 12.4 ±2.3*  | 26.9 ±5.57* (s) | 9.10 ±2.03* (s) | 2.59 ±0.50* (s) | 336 ±69      | 398 ±122     | 171 ±43        | 119 ±21        | 16.2 ±1.7  | 38.2 ±6.9     | 66.2 ±13.2     | n.d. |
| RN 02Bt                                                                                  | 5.12 ±0.38* | 6.78 ±1.22      | 14.0 ±2.3       | 130 ±8          | n.d.         | 572 ±253     | 623 ±202       | 750 ±103       | 26.5 ±4.2  | 69.0 ±22.9    | n.d.           | n.d. |
| RN 02Dt                                                                                  | 3.31 ±1.23* | 334 ±88 (s)     | 2.26 ±0.70* (s) | 381 ±138        | 19.7 ±3.8    | 611 ±170     | 99.5 ±12.2     | 89.7 ±13.7     | 21.9 ±2.6  | n.d.          | n.d.           | n.d. |
| RN 03At                                                                                  | n.d.        | 1.73 ±0.78      | 2.27 ±1.17      | n.d.            | n.d.         | 177 ±51      | 144 ±37        | 241 ±45        | 19.6 ±2.8  | 16.7 ±2.6     | n.d.           | n.d. |
| RN 04Bt                                                                                  | 5.41 ±0.92* | 6.61 ±1.23*     | 6.53 ±1.09* (s) | 22.3 ±4.3       | 78.5 ±23.3   | 253 ±60      | 99.3 ±13.2     | 119 ±17        | 6.75 ±0.76 | 109 ±15       | 5.18 ±0.54     | n.d. |
| RN 06Ct                                                                                  | 4.42 ±0.57* | 1.11 ±0.06*     | 2.34 ±0.29* (s) | 320 ±52.5       | 205 ±22      | 304 ±110     | 49.3 ±20.5     | 53.9 ±15.8     | n.d.       | 43.1 ±18.4    | n.d.           | n.d. |
| RN 06Dt                                                                                  | n.d.        | n.d.            | n.d.            | n.d.            | n.d.         | n.d.         | n.d.           | n.d.           | n.d.       | n.d.          | n.d.           | n.d. |
| RN 07At                                                                                  | 718 ±227    | 595 ±167        | 148 ±50         | 11.2 ±1.5       | n.d.         | 406 ±75      | 144 ±5         | 181 ±44        | n.d.       | 9.09 ±1.80    | n.d.           | n.d. |
| RN 07Bt                                                                                  | 6.81 ±1.01* | 3.64 ±1.03* (s) | 2.54 ±0.77* (s) | 388 ±119        | n.d.         | 578 ±120     | 199 ±45        | 203 ±72        | 14.1 ±2.8  | 7.33 ±1.36    | n.d.           | n.d. |
| RN 08Bt                                                                                  | 5.93 ±0.47  | 1.06 ±0.07      | 4.34 ±0.40      | 0.550 ±0.046    | 0.110 ±0.024 | 0.459 ±0.151 | 0.131 ±0.040   | 0.176 ±0.028   | n.d.       | 0.126 ±0.028  | n.d.           | n.d. |
| RN 08Dt                                                                                  | 3.26 ±0.71  | 0.405 ±0.098    | 2.28 ±0.71      | 0.254 ±0.091    | n.d.         | 0.113 ±0.036 | 0.0781 ±0.0217 | 0.0963 ±0.0357 | n.d.       | n.d.          | n.d.           | n.d. |
| RN 09At                                                                                  | 6.84 ±1.87  | 2.21 ±0.55      | 8.44 ±0.73      | 1.26 ±0.18      | 0.158 ±0.060 | 0.786 ±0.214 | 0.133 ±0.049   | 0.182 ±0.047   | n.d.       | 0.0100 ±0.002 | n.d.           | n.d. |
| RN 09Bt                                                                                  | 19.5#       | n.d.            | n.d.            | n.d.            | n.d.         | 2.21#        | 1.51#          | 1.38#          | n.d.       | 0.298#        | n.d.           | n.d. |
| RN 09Ct                                                                                  | 7.55 ±2.33  | 6.78 ±0.80      | 5.65 ±1.07      | 0.751 ±0.182    | 0.282 ±0.114 | 0.774 ±0.019 | 0.0778 ±0.0198 | 0.0871 ±0.0200 | n.d.       | 0.342 ±0.169  | 0.0604 ±0.0174 | n.d. |
| RN 10At                                                                                  | 9.77 ±3.36* | 1.04 ±0.32*     | 889 ±233        | 95.8 ±28.8      | n.d.         | 469 ±30      | 306 ±59        | 443 ±117       | n.d.       | 12.6 ±1.5     | n.d.           | n.d. |
| RN 10Bt                                                                                  | 9.91 ±3.63* | 14.8 ±5.8* (s)  | 4.78 ±1.02* (s) | 1.07 ±0.34* (s) | 238 ±76      | 304 ±84      | 116 ±3         | 155 ±24        | n.d.       | 14.6 ±5.4     | 165 ±73        | n.d. |

Chemotaxonomy of Mycotoxigenic Small-Spored *Alternaria* Fungi – Do Multitoxin Mixtures Act as an Indicator for Species Differentiation?

| Table-S4                                                                                 | TeA         | AOH             | AME                | ATL         | sum(iso)ALT | ATX-I              | ATX-II    | STTX-III            | ALP               | TEN        | AA-III    | INF  |
|------------------------------------------------------------------------------------------|-------------|-----------------|--------------------|-------------|-------------|--------------------|-----------|---------------------|-------------------|------------|-----------|------|
| mean content in g/kg (marked with *) ± SD in g/kg or mean content in mg/kg ± SD in mg/kg |             |                 |                    |             |             |                    |           |                     |                   |            |           |      |
| <i>Alternaria infectoria</i> isolates                                                    |             |                 |                    |             |             |                    |           |                     |                   |            |           |      |
| CSB 210.86                                                                               | 4.01 ±0.89  | 4.20 ±0.19      | 4.34 ±0.98         | n.d.        | n.d.        | n.d.               | n.d.      | n.d.                | n.d.              | n.d.       | n.d.      | d.   |
| GH 04i                                                                                   | n.d.        | n.d.            | n.d.               | n.d.        | n.d.        | 0.403 ±0.157       | n.d.      | n.d.                | 48.9 ±4.4         | n.d.       | n.d.      | d.   |
| GH 09i                                                                                   | n.d.        | n.d.            | n.d.               | n.d.        | n.d.        | 2.24 ±0.02         | n.d.      | n.d.                | 107 ±10           | n.d.       | n.d.      | d.   |
| GH 10i                                                                                   | n.d.        | n.d.            | n.d.               | n.d.        | n.d.        | n.d.               | n.d.      | n.d.                | n.d.              | n.d.       | n.d.      | n.d. |
| GH 12i                                                                                   | n.d.        | n.d.            | n.d.               | n.d.        | n.d.        | 11.2 ±1.6          | n.d.      | 1.30 ±0.39          | 315 ±68           | n.d.       | n.d.      | d.   |
| GH 13i                                                                                   | n.d.        | n.d.            | n.d.               | n.d.        | n.d.        | 1.56 ±0.60         | n.d.      | n.d.                | 94.6 ±34.8        | n.d.       | n.d.      | d.   |
| GH 19i                                                                                   | n.d.        | n.d.            | n.d.               | n.d.        | n.d.        | n.d.               | n.d.      | n.d.                | n.d.              | n.d.       | n.d.      | n.d. |
| GH 28i                                                                                   | 1.03 ±0.15* | 173 ±20 (s)     | 202 ±64 (s)        | 8.75 ±0.58  | 15.4 ±0.2   | 39.3 ±6            | 12.8 ±0.4 | 21.5 ±1.5           | n.d.              | 30.2 ±9.3  | n.d.      | n.d. |
| GH 33i                                                                                   | n.d.        | n.d.            | n.d.               | n.d.        | n.d.        | n.d.               | n.d.      | n.d.                | n.d.              | n.d.       | n.d.      | n.d. |
| GH 34i                                                                                   | n.d.        | n.d.            | n.d.               | n.d.        | n.d.        | n.d.               | n.d.      | n.d.                | 9.39 ±8.44        | n.d.       | n.d.      | d.   |
| GH 38i                                                                                   | n.d.        | n.d.            | n.d.               | n.d.        | n.d.        | 24.5 <sup>#</sup>  | n.d.      | n.d.                | 44.5 ±21.3        | n.d.       | n.d.      | d.   |
| GH 40i                                                                                   | n.d.        | n.d.            | n.d.               | n.d.        | n.d.        | 14.8 ±1.9          | n.d.      | n.d.                | 151 ±15           | n.d.       | n.d.      | d.   |
| GH 41i                                                                                   | n.d.        | n.d.            | n.d.               | n.d.        | n.d.        | n.d.               | n.d.      | n.d.                | 20.4 ±5.9         | n.d.       | n.d.      | d.   |
| GH 45i                                                                                   | n.d.        | n.d.            | n.d.               | n.d.        | n.d.        | 3.86 ±0.48         | n.d.      | 0.0533 <sup>#</sup> | 122 ±14           | n.d.       | n.d.      | d.   |
| GH 47i                                                                                   | n.d.        | n.d.            | n.d.               | n.d.        | n.d.        | n.d.               | n.d.      | n.d.                | 33.6 ±24.1        | n.d.       | n.d.      | d.   |
| GH 48i                                                                                   | n.d.        | n.d.            | n.d.               | n.d.        | n.d.        | 8.01 ±1.45         | n.d.      | 2.24 <sup>#</sup>   | 215 ±37           | n.d.       | n.d.      | d.   |
| GH 53i                                                                                   | n.d.        | n.d.            | n.d.               | n.d.        | n.d.        | 8.20 ±3.16         | n.d.      | n.d.                | 160 ±46           | n.d.       | n.d.      | d.   |
| GH 55i                                                                                   | n.d.        | n.d.            | n.d.               | n.d.        | n.d.        | 4.90 <sup>#</sup>  | n.d.      | n.d.                | 16.8 ±4.2         | n.d.       | n.d.      | d.   |
| GH 56i                                                                                   | n.d.        | n.d.            | n.d.               | n.d.        | n.d.        | 2.25 ±0.99         | n.d.      | n.d.                | 43.1 ±17.8        | n.d.       | n.d.      | d.   |
| GST 01i                                                                                  | n.d.        | n.d.            | n.d.               | n.d.        | n.d.        | 4.35 ±1.30         | n.d.      | n.d.                | 98.4 ±25.1        | n.d.       | n.d.      | d.   |
| GST 25i                                                                                  | 3.15 ±0.62  | 0.885 ±0.198    | 0.206 <sup>#</sup> | n.d.        | n.d.        | 24.8 ±2.5          | n.d.      | 0.913 <sup>#</sup>  | 52.4 ±33.0        | n.d.       | n.d.      | d.   |
| GST 34i                                                                                  | 1.19 ±0.17  | n.d.            | n.d.               | n.d.        | n.d.        | 13.5 <sup>#</sup>  | n.d.      | 0.355 ±0.065        | 4.64 ±1.86        | n.d.       | n.d.      | d.   |
| GST 46i                                                                                  | n.d.        | 0.291 ±0.036    | 7.40 <sup>#</sup>  | n.d.        | n.d.        | n.d.               | n.d.      | n.d.                | 3.44 ±0.76        | n.d.       | n.d.      | d.   |
| GST 51i                                                                                  | n.d.        | 0.383 ±0.045    | 0.315 <sup>#</sup> | n.d.        | n.d.        | 0.993 <sup>#</sup> | n.d.      | n.d.                | 4.28 <sup>#</sup> | n.d.       | n.d.      | d.   |
| RN 04Ai                                                                                  | n.d.        | 2.01 ±0.31* (s) | 1.57 ±0.05* (s)    | 479 ±21 (s) | 268 ±71     | 124 ±58            | 18.7 ±4.7 | 28.5 ±8.4           | 4.00 ±0.21        | 3.74 ±0.68 | 21.4 ±3.8 | n.d. |
| RN 07Ci                                                                                  | n.d.        | 0.819 ±0.246    | 1.17 ±0.20         | 10.7 ±1.2   | n.d.        | n.d.               | n.d.      | n.d.                | 1.05 ±0.01        | n.d.       | n.d.      | d.   |
